# Supplementary material for: Medio‐dorsal thalamic dysconnectivity in chronic knee pain: A possible mechanism for negative affect and pain comorbidity
Source: PubMed Central journal article supplement (PMC10108119; doi:10.1111/ejn.15880), 2022-12-16
Supplement: EJN-57-373-s001.pdf [file EJN-57-373-s001.pdf]

## Supplementary Material

### Analyses overview and accompanying formulas

Imaging data were analysed with FSL.

*For all fMRI analyses, subject-level analyses are required first.*

*The corresponding formula for this manuscript can be depicted as:*

*for each voxel  $i$  in each subject*

$$\text{BOLD}_i = \text{B\_Th}_i * \text{BOLDTh} + \text{B\_Th}_i * \text{CSF} + \text{B\_Th}_i * \text{WM} + \text{B0}_0i$$

*Where*

*Th : mediodorsal thalamus seed, CSF : cerebrospinal fluid, WM: white matter*

Mean CSF and WM time series per subject were used as confounding regressors.

*The manuscript contains 3 main analyses:*

- 1) A group comparison analysis on statistical significant differences in mdThal FC networks in pain participants and controls.

across all subjects at each voxel:

$$\text{BOLDTh}_{\text{group}} = \text{B\_Th}_i * \text{CON\_vs\_CKP} + \text{B\_Th}_i * \text{age} + \text{B\_Th}_i * \text{sex} + \text{B\_Th}_i * \text{FD} + \text{B0}_1i$$

*Where*

*FC: functional connectivity; FD: framewise displacement (movement during scan); ICOAP- Intermittent and Chronic Osteoarthritis pain (pain burden scale).*

The analysis controlled for age, sex, and movement.

- 2) A regression analysis focusing on affect in the pain participants only:

$$\text{BOLDTh}_{\text{group}} = \text{B\_Th}_i * \text{affect} + \text{B\_Th}_i * \text{age} + \text{B\_Th}_i * \text{sex} + \text{B\_Th}_i * \text{FD} + \text{B0}_2i$$

The regression analysis is independent of the significant clusters for the group difference analysis

- 3) A moderation analysis for the interdependence of affect:

This analysis is based on clusters identified as significant from the regression analysis. Mean  $z$  values from significant clusters were entered as the focal independent variable ( $X$ ), affect score as the outcome variable ( $Y$ ), and ICOAP total score as moderating variable ( $W$ ). This was performed with PROCESS v3.4 for SPSS (Hayes, 2017) and essentially requires 2 models:

$$\text{Affect} = X + \text{error} \quad (1)$$

$$\text{Affect} = X + \text{ICOAP} + X * \text{ICOAP} + \text{error} \quad (2)$$

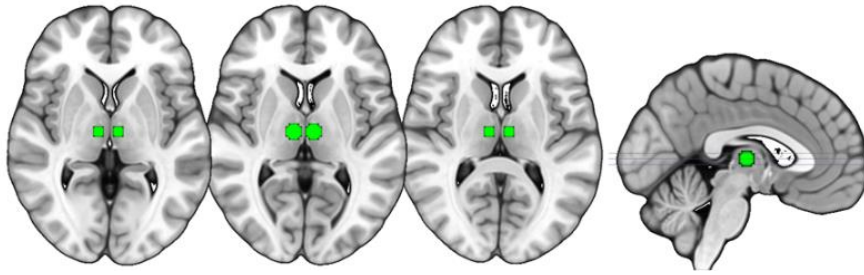

**Figure S1: Mediodorsal thalamic nuclei (MDThal) seed region.**

This figure visualizes the mask used for the MDThal seed. It was created using a 5 mm radius region around MNI coordinates  $x=8, y=-15, z=6$  and  $x=-6, y=-15, z=7$ .

**Table S1.** List of medication taken by patients. Analgesic medication taken within 24 hours are specified with time taken before visit.

| Subjects | Medication                                                                                                                                                                                                                                                                               |
|----------|------------------------------------------------------------------------------------------------------------------------------------------------------------------------------------------------------------------------------------------------------------------------------------------|
| 1        | no data available                                                                                                                                                                                                                                                                        |
| 2        | none                                                                                                                                                                                                                                                                                     |
| 3        | ibuprofen 400mg (3 hours before visit), atorvastatin, lansoprazole, cetirizine                                                                                                                                                                                                           |
| 4        | fibrojel, trospium chloride                                                                                                                                                                                                                                                              |
| 5        | atenolol 50mg, ramipril 10mg                                                                                                                                                                                                                                                             |
| 6        | Omeprazole, Thyroxine 1.25mg                                                                                                                                                                                                                                                             |
| 7        | tramadol 50mg (6 hours before visit), paracetamol 500mg (6 hours before visit) metformin 500mg, NovoRapid FlexPen 100mg, marol 100mg, candesartan 16mg, aspirin 75mg, bendroflumethiazide 2.5mg, fenbid 5% gel, lanzoprozole 15mg, lantus 100 units, laxido orange powder sachets        |
| 8        | codeine phosphate 2 x 30mg, simvastatin 40mg, amitriptyline 10mg, voltarol gel, paracetamol                                                                                                                                                                                              |
| 9        | ramipril 5mg, amipril 5mg, glucosamine & cod liver oil and garlic tablet                                                                                                                                                                                                                 |
| 10       | co-dydramol 10mg/500mg (3 hours before visit), diclofenac 116% gel, hypromellose 0.3% (eye drops), pantoprazole 20mg, peptac liquid                                                                                                                                                      |
| 11       | paracetamol 1000mg (6 hours before visit)                                                                                                                                                                                                                                                |
| 12       | none                                                                                                                                                                                                                                                                                     |
| 13       | amlodipine 5mg, aspirin 75mg, beclometasone 50mg, betamethasone valerate 0.025% cream, bisoprolol 10mg, cichocaine 0.5%, fenbid 5% gel, furosemide 40mg, glyceryl trinitraide 400mg, mometasone 50mg, nicorandil 10mg/20mg, omeprazole 20mg, ramipril 10mg, simvastatin 20mg, Tardisc XL |
| 14       | HRT, antihistamine                                                                                                                                                                                                                                                                       |
| 15       | citalopram 20mg, glucosamide                                                                                                                                                                                                                                                             |
| 16       | Tramadol 100mg (13 hours/4 hours/1 hour before visit), Amitriptyline 20mg, Amlodipine 10mg, Citalopram 20mg, Omeprazole 20mg, Paracetamol 4 x 1000mg, Ramipril 2.5mg, Rizatriptan 5mg, Tramadol 4 x 50mg-100mg                                                                           |
| 17       | Cocodamol, codein 8mg                                                                                                                                                                                                                                                                    |
| 18       | paracetamol 2 x 500mg (2 hours before visit), codeine 30mg (2 hours before visit), Glucoside, Omeprazole 10mg                                                                                                                                                                            |
| 19       | Paracetamol 500mg (20 hours before visit), Aspirin 75mg, Atorvastatin 80mg, Betahistine 16mg, Bisoprolol 2.5mg, Cetirizine 10mg, Clenil Modulite 200mg, dermol 500 lotion, Enalapril 5mg, Febuxostat 80mg, Glyceryl Trinitrate 400mg, Haclan 4 microgram/sqcm 7.5cm, Lantus 100          |

|    |                                                                                                                                                                                                                                                                                                                                       |
|----|---------------------------------------------------------------------------------------------------------------------------------------------------------------------------------------------------------------------------------------------------------------------------------------------------------------------------------------|
|    | units/ml, Levothyroxine sodium 25mg, Metformin 500mg, Mirtazapine 15mg, Omeprazole 10mg, Salbutamol 100microgram, Senna 7.5mg, Quinine bisulfate 300mg, Tardisc XL                                                                                                                                                                    |
| 20 | Tramadol 50mg (5 and 1 hours before visit), nefopam 30 mg (5 and 1 hours before visit), lycrica 300mg (5 and 1 hours before visit), ibuprofen 400mg (5 and 1 hours before visit), Alphosyl shampoo, cetraben cream, Docusate 100mg, Hydroxyzine 25mg, ibuprofen 400mg, laxido oral powder sachet, paracetamol 500mg, ranitidine 150mg |
| 21 | Aspirin 75mg (3 hours before visit), Gabapentin 300mg (3 hours before visit), Zapain 30mg/500mg tabs, Citalopram 20mg, Atorvastatin 10mg, Lansoprazole 30mg, Flecainide 2 x 50mg, Bisoprolol 2.5mg,                                                                                                                                   |
| 22 | none                                                                                                                                                                                                                                                                                                                                  |
| 23 | Paracetamol 2 x 500mg (4 hours before visit), risedronate sodium 35mg/week, betmiga 50mg, rapamune 3mg, folic acid 5mg, adval d3 1500mg daily, lanzoprazole 30mg, ramipril 7.5mg, atorvastatin 30mg, paracetamol as needed, pramipexole 176mg, cefalexin 250mg, prednisolone 7.5mg, ranitidine                                        |
| 24 | metformin, lansoprazole 30mg, naproxen 2 x 500mg, Amitriptyline 10mg, Greenlan lancets (0.35mm/28 gauge), Gliclazide 40 & 80mg, Simvastatin 40mg, Sukkarto SR 2 x 1000mg                                                                                                                                                              |
| 25 | Paracetamol 2 x 500mg (11 hours before visit), Finasteride plus doxazosin, atrovastatin                                                                                                                                                                                                                                               |
| 26 | ibuprofen                                                                                                                                                                                                                                                                                                                             |
| 27 | statins                                                                                                                                                                                                                                                                                                                               |
| 28 | Naproxen 500mg (8 hours before visit), co-codamol 30mg/500mg (8 hours before visit), Nefopam 30mg (8 hours before visit), Amitriptyline 10mg, Cetirizine 10mg, Fenbid Forte 10%gel, Omeprazole 40mg, Simvastatin 40mg                                                                                                                 |
| 29 | Paracetamol 2 x 500mg (14 hours before visit), Volterol (15 hours before visit), Loperamide                                                                                                                                                                                                                                           |
| 30 | amitriptyline 20mg (15 hours before visit), levothyroxine                                                                                                                                                                                                                                                                             |
| 31 | Gabapentin 500mg (3 hours before visit), tramadol (3 hours before visit), dihydrocodeine 1/20mg (3 hours before visit), ibuprofen 400mg (3 hours before visit)and paracetamol 2 x 500mg (3 hours before visit), Warfarin replacement, statin                                                                                          |
| 32 | Paracetamol 2 x 500mg (1 hour before visit) and 1 x 500mg (11 hours before visit), blood pressure tablet, lansoprazole                                                                                                                                                                                                                |
| 33 | Duloxetine 2 x 30mg (15 hours and 4 hours before visit), Amitriptyline 50mg, Docusate 2 x 100mg, Omeprazole 20mg, Amlodipine 10mg, Atorvastatin 20mg, paracetamol 500mg (8 x max), losartan 100mg                                                                                                                                     |
| 34 | Paracetamol (3 hours before visit), Atorvastatin 80mg, Capsaicin 0.075%, Lidocaine 5% plaster, Ramipril 5mg, Aspirin 75mg, Atenolol 50mg                                                                                                                                                                                              |
| 35 | pregabalin (3 hours before visit), Amlodipine, Seroxin 100mg, Bezofibrate, Omeprazole, naproxen, morphine patches (3 days before visit), amitriptyline                                                                                                                                                                                |
| 36 | ibuprofen (12 hours before visit)                                                                                                                                                                                                                                                                                                     |
| 37 | Naproxen 500mg (3 hours before visit), Amlodipine 10mg, lansoprazole 30mg, Liptor 20mg, Paracetamol 500mg as needed, Codeine phosphate 15mg                                                                                                                                                                                           |
| 38 | none                                                                                                                                                                                                                                                                                                                                  |
| 39 | co-codamol 2 x 300/500 mg (3 hours before visit), Naproxen 50 mg (3 hours before visit), Linzaprazole, atenolol, aspirin, feramous, Omeprazole                                                                                                                                                                                        |
| 40 | none                                                                                                                                                                                                                                                                                                                                  |
| 41 | Zapain 30mg/500mg (12 hours before visit), Amlodipine 5mg, Atorvastatin 10mg, Colecalciferol 400unit, Fenbid forte 10% gel, Gliclazide 80mg, Indapramide 2.5mg, Pantoprazole 40mg                                                                                                                                                     |
| 42 | Indapramide 2.5mg, Sokkarto SR 500mg, Irbesartan 300mg, Empagliflozin 10mg, insulin                                                                                                                                                                                                                                                   |
| 43 | none                                                                                                                                                                                                                                                                                                                                  |
| 44 | Thyroxine, antihistamine, Paracetamol, ibuprofen as needed                                                                                                                                                                                                                                                                            |
| 45 | paracetamol 2 x 500 mg (5 hours before visit), ibuprofen 2 x 200 mg (5 hours before visit)                                                                                                                                                                                                                                            |
| 46 | Paracetamol 2 x 500mg (3 hours before visit), Adcal D3 2 x 750mg twice/day, Amitriptyline 3 x 10mg, Aspirin 75mg, Folic acid 5mg, Hylotear 0.1% eye-drop, Methorexate 2.5mg/week, Mirabegran 50mg                                                                                                                                     |

|    |                                                                                                                                                                                                                                                                                                                                                                                                         |
|----|---------------------------------------------------------------------------------------------------------------------------------------------------------------------------------------------------------------------------------------------------------------------------------------------------------------------------------------------------------------------------------------------------------|
| 47 | Clonidine 2 x 25mg                                                                                                                                                                                                                                                                                                                                                                                      |
| 48 | Gabapentin as needed, cortisone injections 1-2/year                                                                                                                                                                                                                                                                                                                                                     |
| 49 | paracetamol (1 hour before visit), bisoprolol, statins, aspirin, Omeprazole                                                                                                                                                                                                                                                                                                                             |
| 50 | inhaler fostair, alopurinol, salbutamol                                                                                                                                                                                                                                                                                                                                                                 |
| 51 | Naproxen 500mg as needed, Omeprazole 20mg, Atrovastatin 20mg                                                                                                                                                                                                                                                                                                                                            |
| 52 | Dihydrocodeine 2 x 60mg twice/daily (8 hours before visit), Pregabalin 3 x 100mg (8 hours before visit), Amitriptyline 75mg, Amlodipine 5mg, Warfarin 3mg                                                                                                                                                                                                                                               |
| 53 | paracetamol (1 hour before visit), bisoprolol, statins, aspirin, Omeprazole                                                                                                                                                                                                                                                                                                                             |
| 54 | Paracetamol 2 x 500mg (4 hours before visit)                                                                                                                                                                                                                                                                                                                                                            |
| 55 | none                                                                                                                                                                                                                                                                                                                                                                                                    |
| 56 | Cortisone injection (3 weeks ago)                                                                                                                                                                                                                                                                                                                                                                       |
| 57 | Paracetamol as needed, ibuprofen as needed, ibugel, Allopurinol 100mg, Aspirin 75mg, Atorvastatin 40mg, indapamide 25mg, Omeprazole 20mg, Ramipril 10mg, Tildiem LA                                                                                                                                                                                                                                     |
| 58 | none                                                                                                                                                                                                                                                                                                                                                                                                    |
| 59 | Doxadosine, cotenadone, glucosamine 1500mg                                                                                                                                                                                                                                                                                                                                                              |
| 60 | Naproxen 2 x 500mg (12 and 4 hours before visit), Omeprazole 2 x 20mg, Atrovastatin 20mg, Ramipril 10mg                                                                                                                                                                                                                                                                                                 |
| 61 | none                                                                                                                                                                                                                                                                                                                                                                                                    |
| 62 | Paracetamol 2 x 500mg (5 and 1 hours before visit), Omeprazole 20mg                                                                                                                                                                                                                                                                                                                                     |
| 63 | Paracetamol as needed                                                                                                                                                                                                                                                                                                                                                                                   |
| 64 | Citalopram, antibiotics, Vitamin D, glucosamine, chondroitin, erythromycin, ibugel as needed                                                                                                                                                                                                                                                                                                            |
| 65 | Paracetamol as needed                                                                                                                                                                                                                                                                                                                                                                                   |
| 66 | Naproxen as needed, paracetamol/ibuprofen as needed                                                                                                                                                                                                                                                                                                                                                     |
| 67 | Metformin                                                                                                                                                                                                                                                                                                                                                                                               |
| 68 | Dihydrocodeine 30 mg (1 hour before visit), paracetamol 2 x 500 mg (5 hours before visit), ibuprofen 400 mg (5 hours before visit), Lanzoprazole                                                                                                                                                                                                                                                        |
| 69 | Paracetamol 2 x 500mg (1 hour before visit), Cetirizine, Budesonide 200mg, Pramipexole 88mg, Terbutaline 500mg                                                                                                                                                                                                                                                                                          |
| 70 | Cocodamol 4 x 35mg (1 hour before visit), Omeprazole, Bisoprolol, Metformin                                                                                                                                                                                                                                                                                                                             |
| 71 | Asthma inhaler, Vitamin D                                                                                                                                                                                                                                                                                                                                                                               |
| 72 | Dihydrocodeine 2 x 30 mg (5 hours before visit), paracetamol 500 mg (5 hours before visit), Amitriptyline 25mg, Rerindopril 4mg, Naproxen 500mg, Omeprazole 20mg                                                                                                                                                                                                                                        |
| 73 | Simvador 40mg, Accrete D3 rableb, Apixaban 2 x 2.5mg, Candesartan 2mg, Cetirizine 10mg, Cocodamol 8mg/500mg, DuoResp Spiromax 2 x 160mg, Epilim Chrono 2 x 700mg as needed, Fenbrid 5% gel as needed, Hyprorellose eye drops 0.5%, Levothyroxine sodium 100mg, Monomil XL 60mg, Quetiapine 3 x 25mg, Salbutamol 100mg as needed, Sertraline 100mg                                                       |
| 74 | Ramipril 1.25mg (2 hours before visit), paracetamol 500 mg (2 hours before visit), Aspirin 75mg, Atorvastatin 20mg, bisoprolol 2-5mg, Furosemide 20mg if necessary, Glucoject lancets Plus 0.2mm/33 gauge insulatard penfill 100 units, levothyroxine sodium 50+25mg, metformin 500mg x2, Ranitidine 2 x 150mg, Sildenafil 100mg, Tolterodine 2 x 1mg, Tramadol when required, Travopost 40mg eye drops |

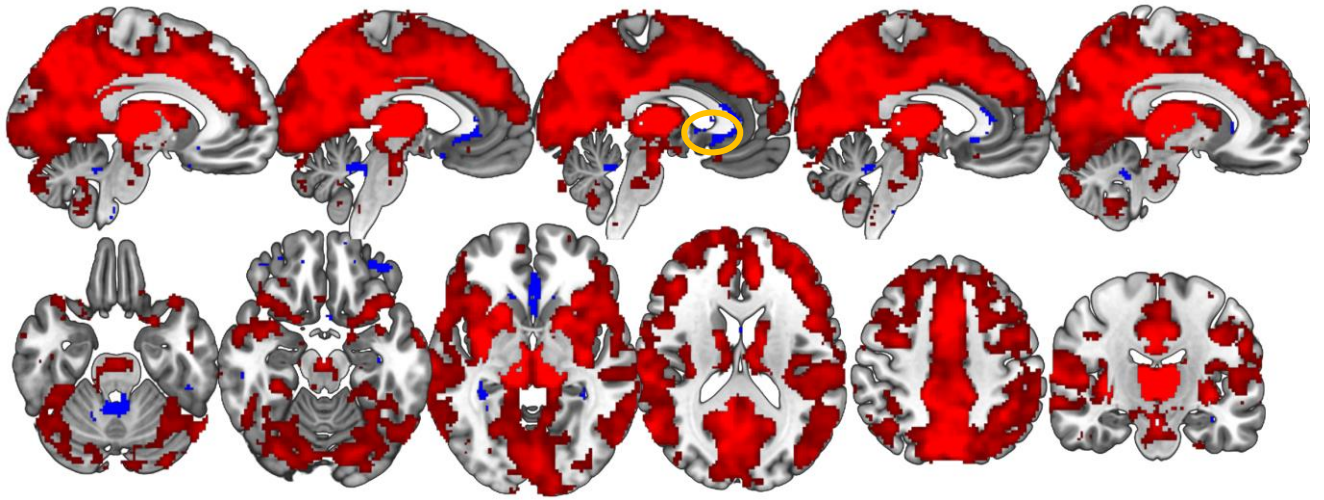

**A: mdTHAL FC maps for chronic knee pain participants**

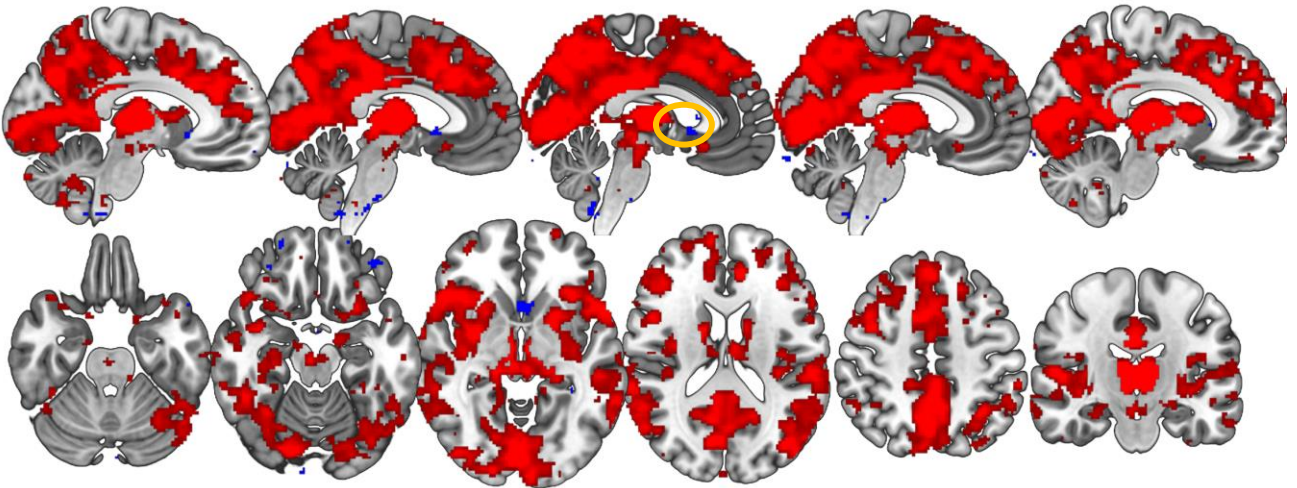

**B: mdTHAL FC maps for control participants**

**Figure S2: Mediodorsal thalamic functional connectivity group maps**

Red colour reflects positive connectivity, blue shows negative connectivity. Minimum z score is 2.3.

These maps are not suitable for drawing statistical inference but serve to enhance interpretation of the significant group differences by visual comparison to the statistically significant differences. Without such reference, a significant cluster in figure 1 (main manuscript) can mean either 1) one group has a higher mean FC value in this cluster than the other group, or 2) either group has a mean FC value in this cluster while the other group does not show any connection between the seed region and this cluster (i.e. the pattern only exists in one group), or 3) the significant cluster is based on negative connectivity and depicts the reverse of 1).

As example: The sgACC is one cluster that was found to be significantly different in the group comparison (figure 1 of main manuscript), is circled in yellow. This connection is negative (anticorrelation) in both groups while most clusters are based on positive connectivity.

### Affect regression

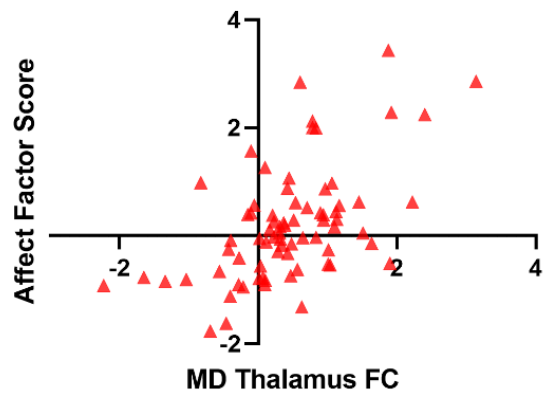

**Figure S3. Regression analysis of the MDThal positive functional connectivity related to affect score in chronic knee pain participants.**

Mean z values of the ten largest positively correlated clusters plotted against affect score.

### Medication effects

In consideration for potential medication effects, the partial correlation and moderation analysis was repeated excluding any patients who had either taken opioid medication or were prescribed antidepressant medication, resulting in a total of 51 patients. The partial correlation remained significant ( $r = .57, p < .001$ ). To visualise whether there was any systematic effect of medication, we plotted using a colour-code of those on each type of medication (Figure S5).

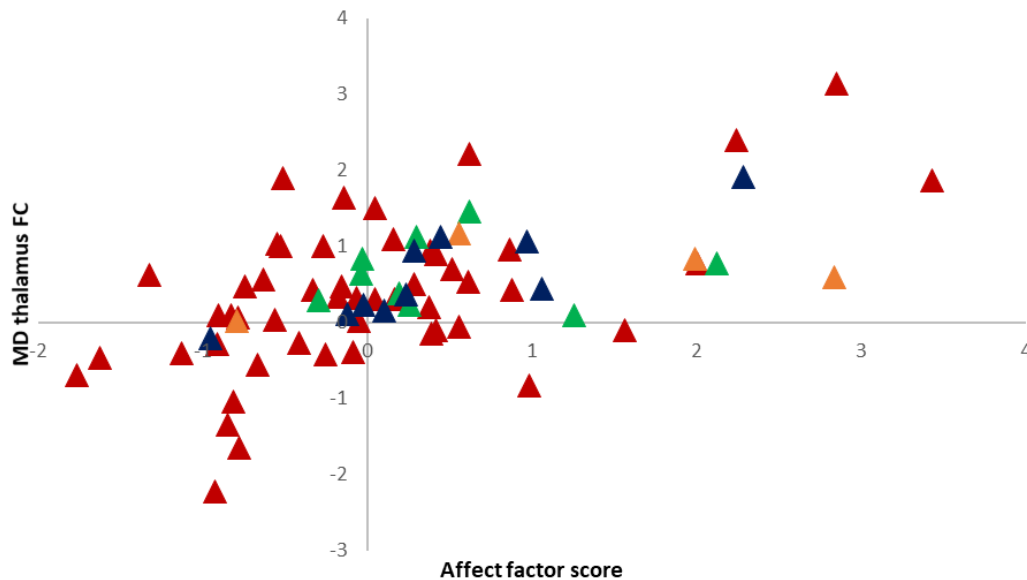

**Figure S4. Regression analysis of the MD thalamus functional connectivity coloured according to medication type**

Regression analysis of the MD thalamus functional connectivity related to affect score in chronic knee pain patients. Mean z values of the ten largest positively correlated clusters plotted against affect score and colour-coded according to medication type: blue: on antidepressant medication only; green: taken opioid medication only within the last 24 hours; orange: on antidepressant medication and taken opioid medication within the last 24 hours; red: all other patients.

The moderation analysis also remained significant with a significant moderating effect of ICOAP score on the strength of the relationship between the MD thalamus FC and affect score (interaction:  $b = .11, t(42) = 3.6, p < .001$ ). This relationship was again significant in those with 1SD below the mean, at the mean, and 1SD above the mean for ICOAP score, with the effect being strongest in those with high ICOAP scores. The point at which this effect became significant and remained significant was at a Rasch-transformed ICOAP score of -2.78.
